# Supplementary material for: One-pot synthesis of a highly mesoporous Ni/MgAl2O4spinel catalyst for efficient steam methane reforming: influence of inert annealing
Source: Royal Society of Chemistry journal article supplement (doi:10.1039/d1cy00485a), 2021-01-01
Supplement: d1cy00485a1.pdf [file d1cy00485a1.pdf]

Electronic Supplementary Material (ESI) for Catalysis Science & Technology.  
This journal is © The Royal Society of Chemistry 2021

## Supporting Information for:

### **One-Pot Synthesis of Highly Mesoporous Ni/MgAl<sub>2</sub>O<sub>4</sub> Spinel Catalyst for Efficient Steam-Methane Reforming: Influence of Inert Annealing**

Hyunjong Kim<sup>a,1</sup>, Ahmed Al-Shahat Eissa<sup>a,b,1</sup>, Seung Bo Kim<sup>a</sup>, HongJin Lee<sup>a</sup>, Woohyun  
Kim<sup>c</sup>, Dong Joo Seo<sup>c</sup>, Kyubock Lee<sup>a,\*</sup> and Wang Lai Yoon<sup>c</sup>

<sup>a</sup> Graduate School of Energy Science and Technology, Chungnam National University, 99  
Daehak-ro, Yuseong-gu, Daejeon 34134, Republic of Korea

<sup>b</sup> Department of Chemistry, School of Science, South Valley University, Qena 83523, Egypt

<sup>c</sup> Hydrogen Research Department, Korea Institute of Energy Research, 152 Gajeong-ro,  
Yuseong-gu, Daejeon 34129, Republic of Korea

\* Corresponding author: kyubock.lee@cnu.ac.kr

<sup>1</sup> These authors contributed equally to this work.

---

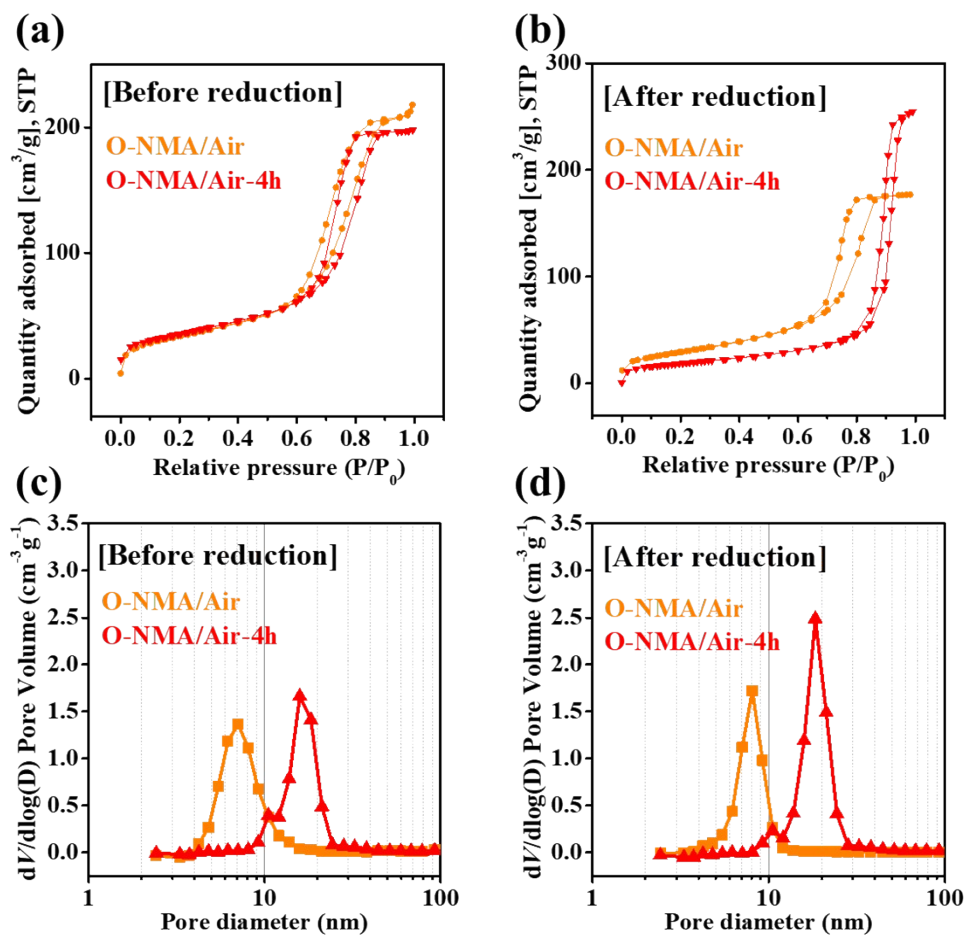

**Fig. S1 – N<sub>2</sub> adsorption/desorption isotherms (a, b) and BJH pore-size distributions (c, d) of mesoporous Ni/MgAl<sub>2</sub>O<sub>4</sub> catalysts subjected to calcination in air for 2.0 h and 4.0 h, before (a, c) and after reduction (b, d).**

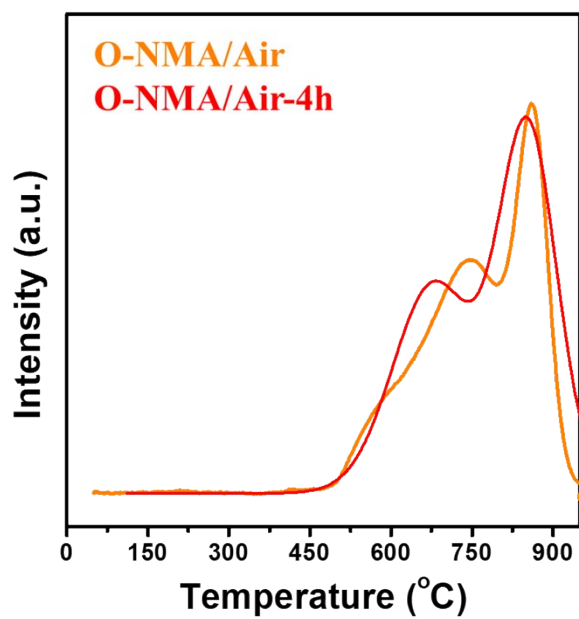

**Fig. S2 – H<sub>2</sub>-TPR of mesoporous Ni/MgAl<sub>2</sub>O<sub>4</sub> catalysts subjected to calcination under air for 2.0 h and 4.0 h.**

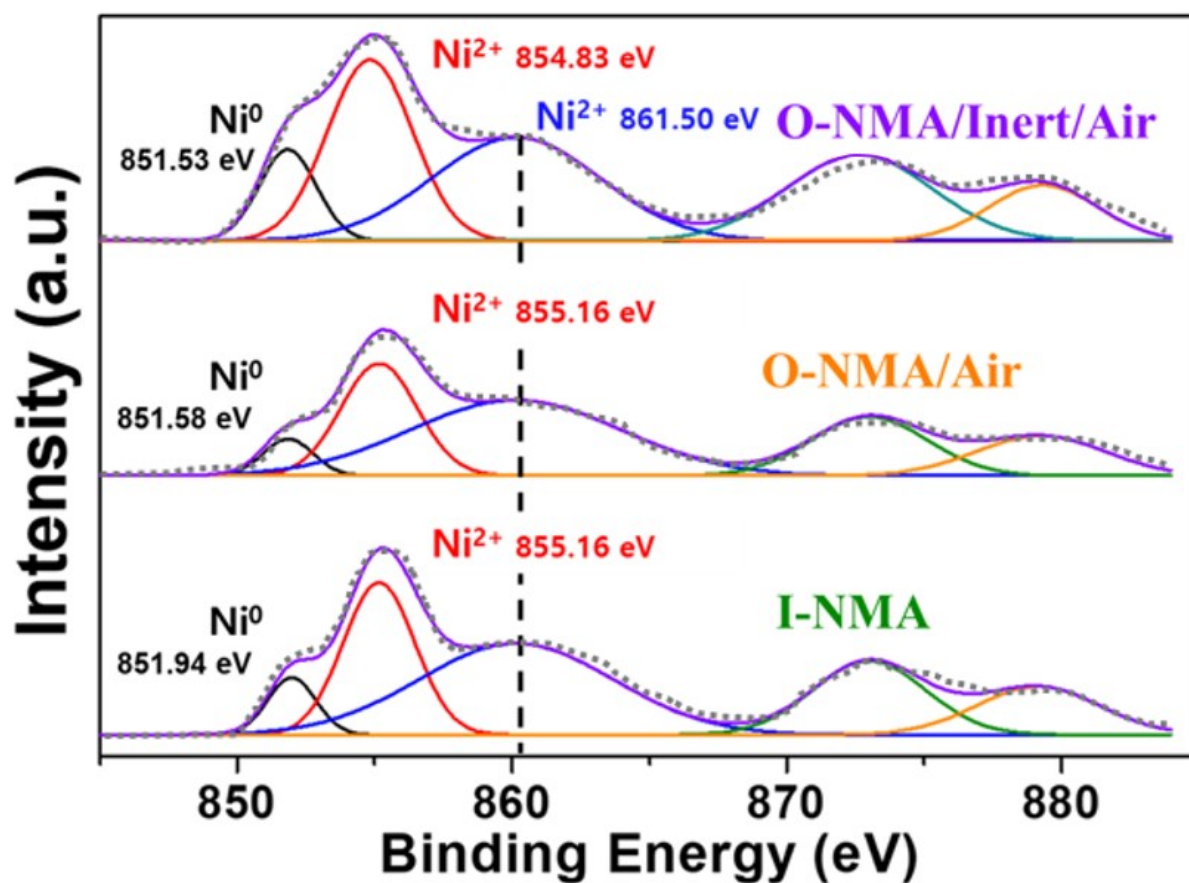

Fig. S3 – Fitted high-resolution XPS spectra of the Ni 2p in the studied catalysts.

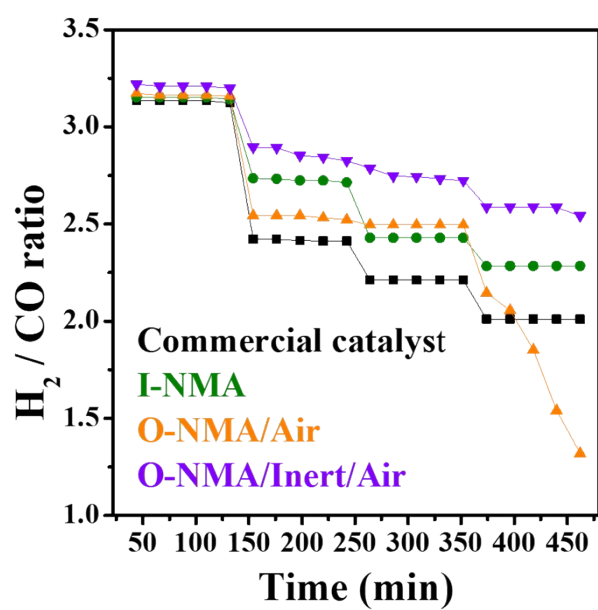

Fig. S4– H<sub>2</sub>/CO ratios of mesoporous Ni/MgAl<sub>2</sub>O<sub>4</sub> catalysts and commercial catalyst at different GHSVs ranging from 10,000 to 40,000 mL g<sub>cat</sub><sup>-1</sup> h<sup>-1</sup>.

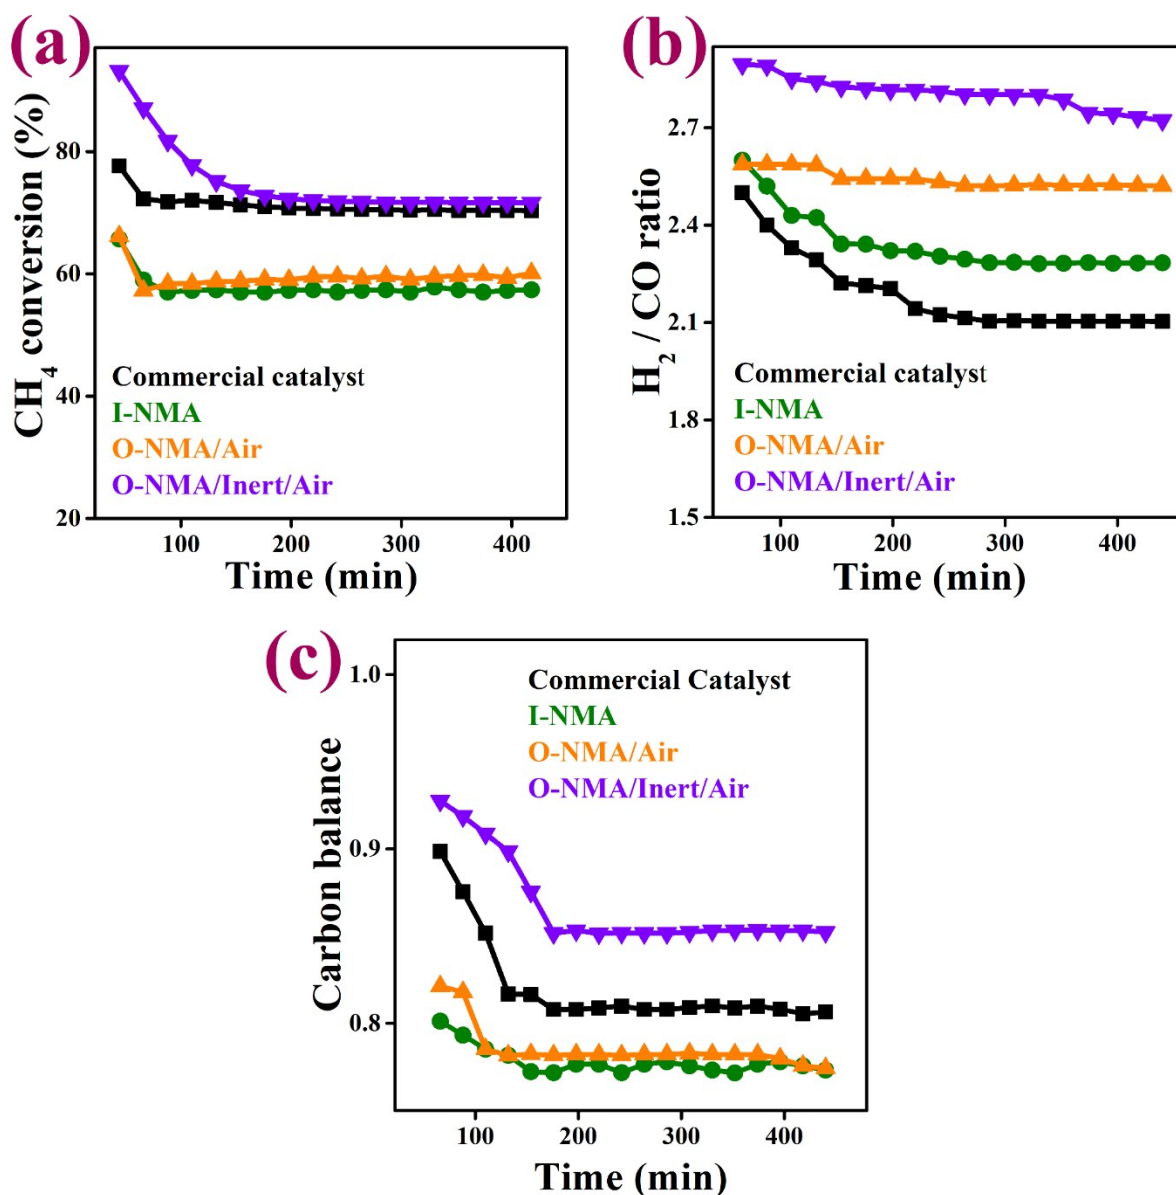

Fig. S5 – CH<sub>4</sub> conversions (a), H<sub>2</sub>/CO ratio (b), and carbon balance (c) of mesoporous Ni/MgAl<sub>2</sub>O<sub>4</sub> catalysts and commercial catalyst at H<sub>2</sub>O/CH<sub>4</sub>= 1, T= 700 °C, P= 1.0 atm., and GHSV= 10,000 mL g<sub>cat</sub><sup>-1</sup> h<sup>-1</sup> for 420 min.

**Table S1: BET surface area, pore volume, and pore diameter of the studied catalysts.**

| <b>Catalyst</b>               | <b>Calcined samples</b>                   |                                       |                           | <b>Reduced samples</b>                    |                                       |                           |
|-------------------------------|-------------------------------------------|---------------------------------------|---------------------------|-------------------------------------------|---------------------------------------|---------------------------|
|                               | <b>BET Surface Area (m<sup>2</sup>/g)</b> | <b>Pore Volume (cm<sup>3</sup>/g)</b> | <b>Pore diameter (nm)</b> | <b>BET Surface Area (m<sup>2</sup>/g)</b> | <b>Pore Volume (cm<sup>3</sup>/g)</b> | <b>Pore diameter (nm)</b> |
| <b>I-NMA</b>                  | 156.17                                    | 0.4185                                | 7.65                      | 98.93                                     | 0.2454                                | 17.63                     |
| <b>O-NMA/Air</b>              | 211.18                                    | 0.4723                                | 8.01                      | 104.37                                    | 0.2735                                | 8.48                      |
| <b>O-NMA/Inert/Air</b>        | 253.08                                    | 0.5814                                | 6.58                      | 122.49                                    | 0.3433                                | 9.36                      |
| <b>O-NMA/Air<sub>4h</sub></b> | 187.49                                    | 0.4327                                | 17.08                     | 83.45                                     | 0.2517                                | 19.88                     |

**Table S2: ICP-OES data of the studied catalysts.**

| Catalyst                | Ni (wt%) | Mg (wt%) | Al (wt%) |
|-------------------------|----------|----------|----------|
| I-NMA                   | 18.1     | 7.7      | 34.2     |
| O-NMA/Air               | 18.3     | 7.8      | 33.8     |
| O-NMA/Inert/Air         | 18.2     | 7.6      | 34.4     |
| O-NMA/Air <sub>4h</sub> | 18.3     | 7.8      | 34.1     |

**Table S3: Binding energies of Ni species in the reduced catalysts.**

| Catalyst        | Binding energy (eV) |                  |
|-----------------|---------------------|------------------|
|                 | Ni <sup>0</sup>     | Ni <sup>2+</sup> |
| I-NMA           | 851.94              | 855.16           |
| O-NMA/Air       | 851.58              | 855.16           |
| O-NMA/Inert/Air | 851.53              | 854.83           |



**Table S4. Comparison of SMR catalytic activity and stability of our catalyst with that of similar composition reported in literature.**

| Catalyst                              | Function | Ni wt% | Reaction Temperature (°C) | GHSV h <sup>-1</sup> | CH <sub>4</sub> conversion | Reference        |
|---------------------------------------|----------|--------|---------------------------|----------------------|----------------------------|------------------|
| O-NMA/Inert/Air                       | SMR      | 18     | 800                       | 10,000               | <b>97.62</b>               | <b>This work</b> |
| O-NMA/Inert/Air                       | SMR      | 18     | 800                       | 20,000               | <b>92.05</b>               | <b>This work</b> |
| O-NMA/Inert/Air                       | SMR      | 18     | 800                       | 30,000               | <b>88</b>                  | <b>This work</b> |
| Ni/MgAl <sub>2</sub> O <sub>4</sub>   | SMR      | 10     | 750                       | 9,600                | 97                         | 1                |
| NiAl <sub>2</sub> O <sub>4</sub>      | SMR      | 31     | 800                       | 12,000               | 97                         | 2                |
| NiAl <sub>2</sub> O <sub>4</sub>      | SMR      | 29     | 700                       | 12,000               | 91                         | 2                |
| NiAl <sub>2</sub> O <sub>4</sub>      | SMR      | 15     | 650                       | 38,400               | 27                         | 3                |
| NiCaAl <sub>2</sub> O <sub>4</sub>    | SMR      | 10     | 850                       | 32,000               | 73                         | 4                |
| NiAl <sub>2</sub> O <sub>4</sub>      | SMR      | 10     | 600                       | 32,000               | 84                         | 5                |
| Ni/MgAl <sub>2</sub> O <sub>4</sub>   | SMR      | 15.3   | 600                       | 48,500               | 48                         | 6                |
| 15Ni/MgAl <sub>2</sub> O <sub>4</sub> | SMR      | 15     | 600                       | 53,400               | 51                         | 7                |
| Ni/MgAl                               | SMR      | 15     | 700                       | 3,000                | 75                         | 8                |

## References

- 1) H.-W. Kim, K.-M. Kang, H.-Y. Kwak and J. H. Kim, *Chem. Eng. J.*, 2011, **168**, 775–783.
- 2) N. Salhi, A. Boulahouache, C. Petit, A. Kiennemann and C. Rabia, *Int. J. Hydrogen Energy*, 2011, **36**, 11433–11439.
- 3) C. Jimenez-Gonzalez, Z. Boukha, B. de Rivas, J. J. Delgado, M. Á. Cauqui, J. R. González-Velasco, J. I. Gutiérrez-Ortiz and R. López-Fonseca, *Appl. Catal. A Gen.*, 2013, **466**, 9–20.
- 4) A. Di Giuliano, K. Gallucci, P. Foscolo and C. Courson, *Int. J. Hydrogen Energy*, 2019, **44**, 6461–6480.
- 5) M. Boudjeloud, A. Boulahouache, C. Rabia and N. Salhi, *Int. J. Hydrogen Energy*, 2019,

44, 9906–9913

- 6) S. Katheria, A. Gupta, G. Deo and D. Kunzru, *Int. J. Hydrogen Energy*, 2016, **41**, 14123–14132.
- 7) V. K. Jaiswar, S. Katheria, G. Deo and D. Kunzru, *Int. J. Hydrogen Energy*, 2017, **42**, 18968-18976.
- 8) N. Y. Kim, E.-H. Yang, S.-S. Lim, J. S. Jung, J.-S. Lee, G. H. Hong, Y.-S. Noh, K. Y. Lee and D. J. Moon, *Int. J. Hydrogen Energy*, 2015, **40**, 11848–11854.
